# Supplementary material
Source: HighWire-hosted journal article supplement (http://www.jneurosci.org/highwire/filestream/599995/field_highwire_adjunct_files/6/Supplemental_Table.pdf)
Supplement: Supplemental_Table.pdf [file Supplemental_Table.pdf]

**Supplemental Table 1.** Task-relevant Non-associative Behaviors

| Genotype                      | Benzaldehyde |              |
|-------------------------------|--------------|--------------|
|                               | NAIVE        | OCT+90V      |
| <i>drk<sup>EOA</sup>/+</i>    | 68.98 ± 3.16 | 61.31 ± 3.76 |
| <i>drk<sup>AP24</sup>/+</i>   | 65.79 ± 3.28 | 57.18 ± 4.21 |
| <i>ry<sup>506</sup></i>       | 68.23 ± 2.42 | 57.14 ± 3.27 |
| <i>drkR-1.2/+;drkR-2/+</i>    | 83.45 ± 5.18 | 65.00 ± 5.96 |
| <i>drkR-1.2/c772;drkR-2/+</i> | 84.46 ± 1.20 | 59.14 ± 5.78 |

Benzaldehyde avoidance after prior exposure to Octanol and 12 90 Volt electric shocks. Although pre-exposure to OCT+90V reduces Benzaldehyde avoidance for all strains differences in performance of experimental animals were not significantly different from that of their respective controls (*ry<sup>506</sup>* and *drkR-1.2/+;drkR-2/+* respectively for the two distinct genetic background groups).
